# Supplementary material for: Single-molecule magnet behavior in an octanuclear dysprosium(iii) aggregate inherited from helical triangular Dy3SMM-building blocks
Source: Royal Society of Chemistry journal article supplement (doi:10.1039/c6dt01718e), 2016-01-01
Supplement: c6dt01718e1.pdf [file c6dt01718e1.pdf]

## Supporting Information

# Single-molecule magnet behavior in octanuclear dysprosium(III) aggregate inherited from helical triangular Dy<sub>3</sub> SMM-building blocks

Li Zhang,<sup>a, b</sup> Peng Zhang,<sup>c</sup> Lang Zhao,<sup>a</sup> Jianfeng Wu,<sup>a, b</sup> Mei Guo,<sup>a, b</sup> Jinkui Tang\*<sup>a</sup>

<sup>a</sup> State Key Laboratory of Rare Earth Resource Utilization, Changchun Institute of Applied Chemistry, Chinese Academy of Sciences, Changchun 130022, P. R. China

<sup>b</sup> University of Chinese Academy of Sciences, Beijing, 100049, P. R. China

<sup>c</sup> Institut für Physikalische Chemie, Universität Stuttgart, Pfaffenwaldring 55, D-70569, Stuttgart, Germany

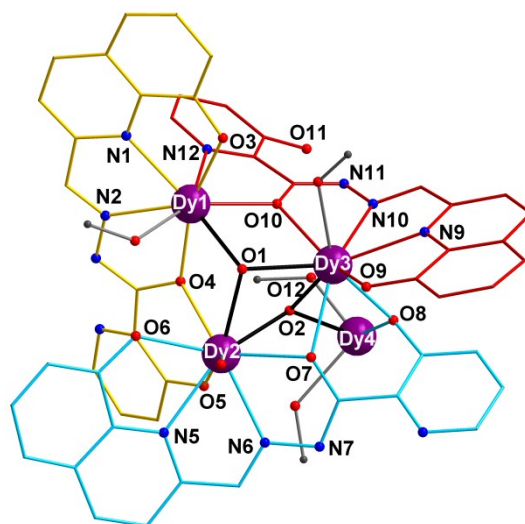

Fig. S1 Asymmetric unit of complex 1.

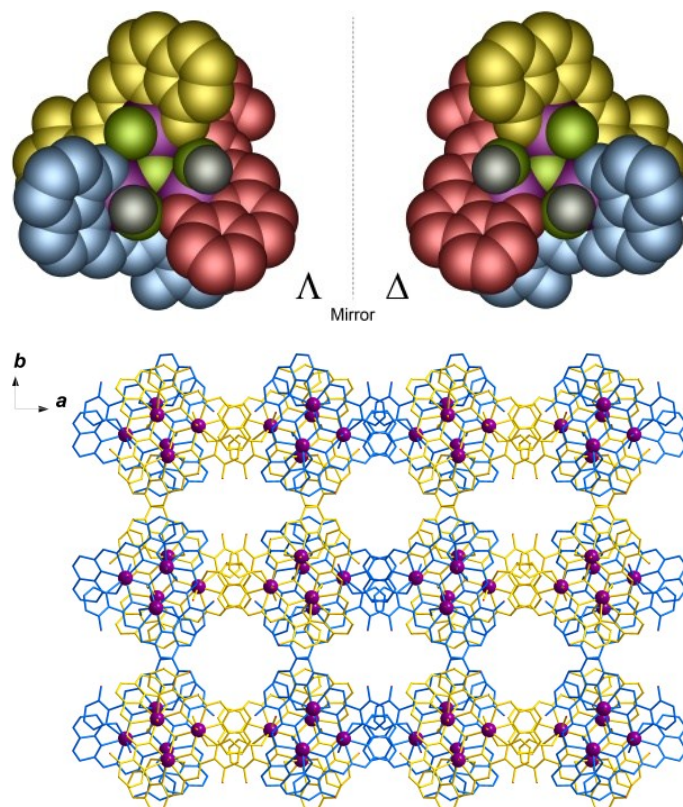

**Fig. S2** Top: Space-filling representations of the left- ( $\Lambda$ ) and right-hand ( $\Delta$ ) configurations of the circular-helical  $Dy_3$  triangles present in complex **2a**. Bottom: packing arrangement of the molecules along  $c$  axis showing the different stereoisomers. Blue and yellow molecules correspond to the left- and right-hand configurations, respectively.

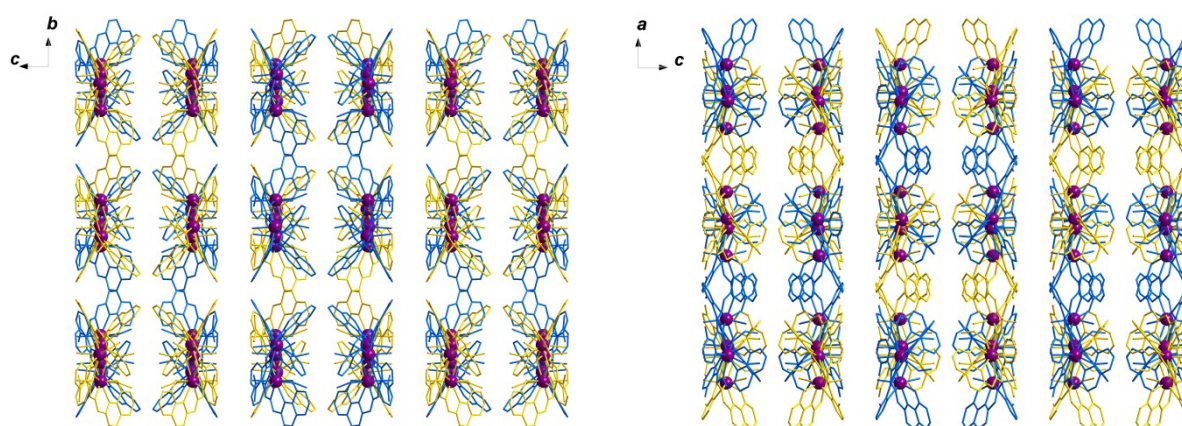

**Fig. S3** Packing arrangement of the molecules along  $a$  and  $b$  axis showing the different stereoisomers for complex **2a**. Blue and yellow molecules correspond to the left- and right-hand configurations, respectively.

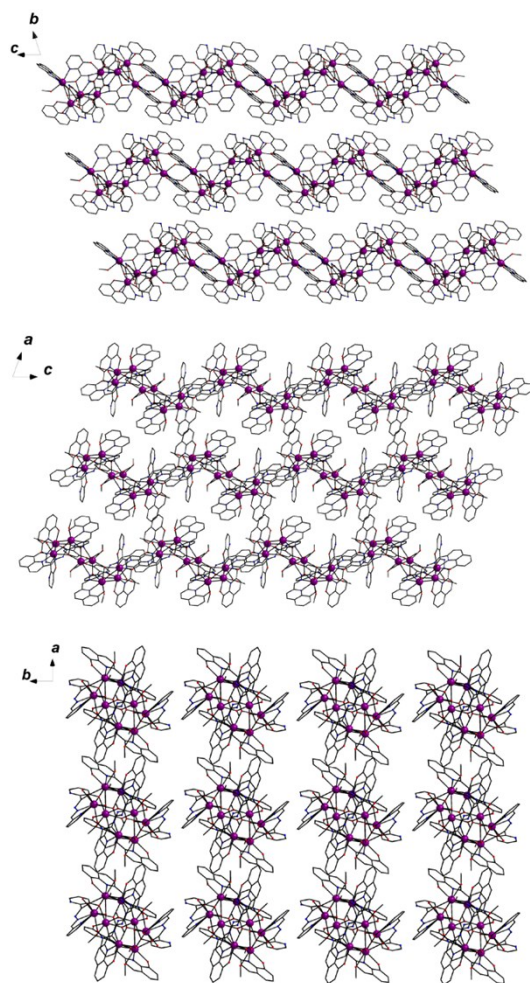

**Fig. S4** Packing arrangement along the crystallographic *a*, *b*, and *c*-axis for complex **1**.

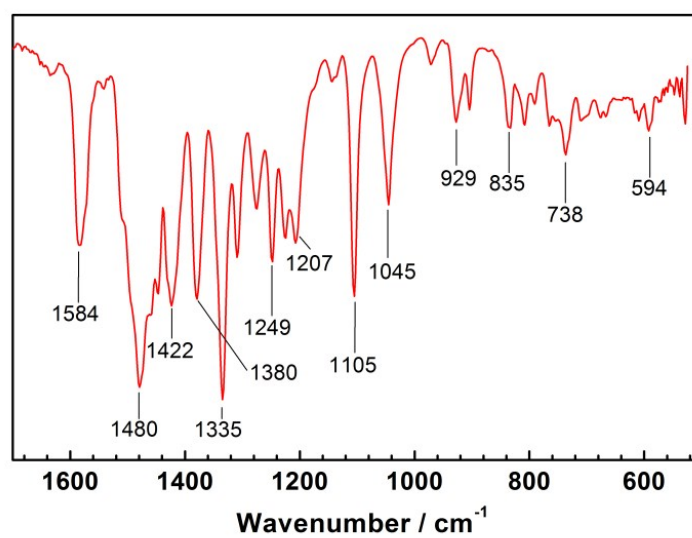

**Fig. S5** Infrared spectrum of **1**.

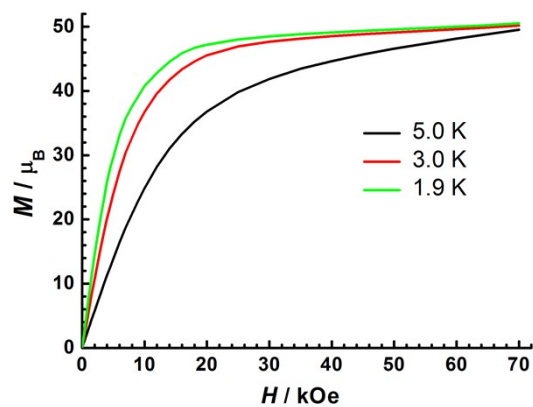

**Fig. S6** Plots of the magnetization  $M$  versus  $H$  in the field range 0-70 kOe and the temperature range of 1.9-5.0 K for **1**.

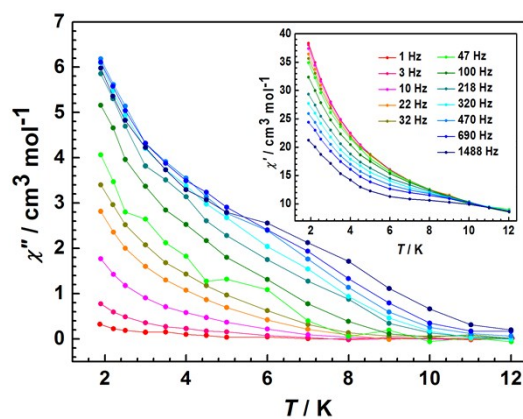

**Fig. S7** Temperature dependence of the out-of-phase ac susceptibility under zero dc field for **1**. Inset: corresponding temperature dependence of the in-phase ac susceptibility.

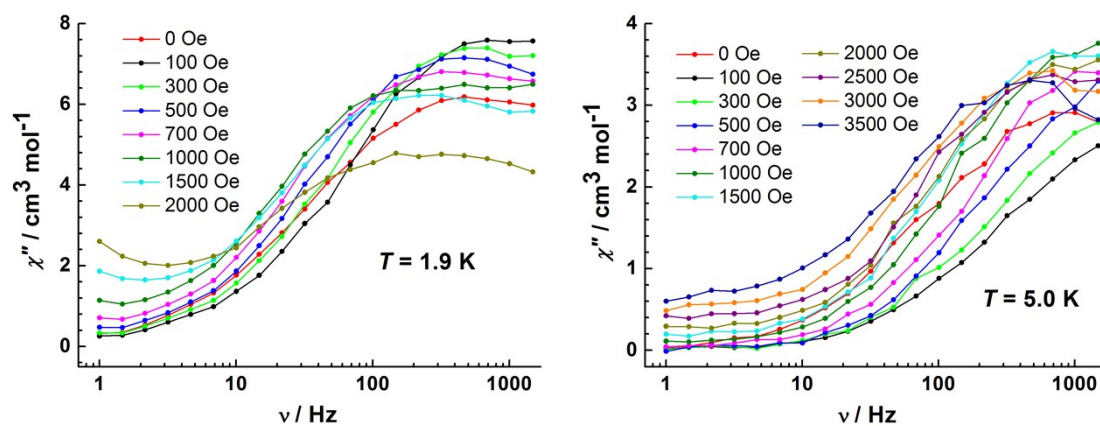

**Fig. S8** Out-of-phase ac susceptibility ( $\chi''$ ) collected on **1** at 1.9 K (left) and 5.0 K (right) under the indicated dc field.

**Table S1.** Lanthanide(III) single-molecule magnets with high nuclearity (Ln<sub>n</sub>, n > 5).

| compound <sup>a</sup>                                                                                                                                                                                                                             | structural feature                                                                 | $U_{\text{eff}} / \text{K}$ | ref |
|---------------------------------------------------------------------------------------------------------------------------------------------------------------------------------------------------------------------------------------------------|------------------------------------------------------------------------------------|-----------------------------|-----|
| [Dy <sub>6</sub> (μ <sub>3</sub> -OH) <sub>4</sub> (L <sup>1</sup> ) <sub>4</sub> (L <sup>2</sup> ) <sub>2</sub> (H <sub>2</sub> O) <sub>9</sub> Cl] <sub>5</sub> ·15H <sub>2</sub> O                                                             | two Dy <sub>3</sub> triangles in a vertex-to-vertex fashion                        | 200                         | 1   |
| [Dy <sub>6</sub> (μ <sub>3</sub> -OH) <sub>4</sub> (ovn) <sub>4</sub> (avn) <sub>2</sub> (NO <sub>3</sub> ) <sub>4</sub> (H <sub>2</sub> O) <sub>4</sub> [(NO <sub>3</sub> ) <sub>2</sub> ·(H <sub>2</sub> O)·3(CH <sub>3</sub> ) <sub>2</sub> CO | two Dy <sub>3</sub> triangles in a vertex-to-vertex fashion                        | 9.6                         | 2   |
| [Dy <sub>6</sub> (L <sup>3</sup> ) <sub>4</sub> (μ <sub>4</sub> -O)(NO <sub>3</sub> ) <sub>4</sub> (CH <sub>3</sub> OH)]·CH <sub>3</sub> OH                                                                                                       | two Dy <sub>3</sub> triangles in a edge-to-edge fashion                            | 33.9, 40.7                  | 3   |
| [Dy <sub>6</sub> (L <sup>4</sup> ) <sub>4</sub> (μ <sub>3</sub> -OH) <sub>4</sub> (CH <sub>3</sub> OH) <sub>2</sub> (NO <sub>3</sub> ) <sub>2</sub> ]·6CH <sub>3</sub> CN                                                                         | two Dy <sub>3</sub> triangles in a edge-to-edge fashion                            | 3.2                         | 4   |
| [[Dy <sub>6</sub> (L <sup>5</sup> ) <sub>2</sub> (L <sup>5</sup> H) <sub>2</sub> ](μ <sub>3</sub> -OH) <sub>4</sub> ][MeOH] <sub>2</sub> [H <sub>2</sub> O] <sub>6</sub> [Cl] <sub>4</sub> ·8H <sub>2</sub> O·4CH <sub>3</sub> OH                 | two Dy <sub>3</sub> triangles in a edge-to-edge fashion                            | 46.2 (5 kOe)                | 5   |
|                                                                                                                                                                                                                                                   |                                                                                    | dc field)                   |     |
| [Dy <sub>6</sub> (L <sup>6</sup> ) <sub>2</sub> (μ <sub>3</sub> -OH) <sub>4</sub> (μ <sub>2</sub> -OH) <sub>2</sub> (SCN) <sub>8</sub> (H <sub>2</sub> O) <sub>4</sub> ]·6CH <sub>3</sub> CN·2CH <sub>3</sub> OH·H <sub>2</sub> O                 | two Dy <sub>3</sub> triangles in a planar Dy <sub>3</sub> +Dy <sub>3</sub> fashion | 116                         | 6   |
| [Dy <sub>6</sub> (L <sup>6</sup> ) <sub>2</sub> (μ <sub>3</sub> -OH) <sub>4</sub> (μ <sub>2</sub> -OH) <sub>2</sub> (NO <sub>3</sub> ) <sub>6</sub> (H <sub>2</sub> O) <sub>6</sub> ]·2NO <sub>3</sub> ·10H <sub>2</sub> O                        |                                                                                    | 181                         |     |
| [Dy <sub>6</sub> (μ <sub>3</sub> -OH) <sub>3</sub> (μ <sub>3</sub> -CO <sub>3</sub> )(μ-OMe)(HL <sup>7</sup> ) <sub>6</sub> (MeOH) <sub>4</sub> (H <sub>2</sub> O) <sub>2</sub> ] <sub>3</sub> ·3MeOH·2H <sub>2</sub> O                           | vertex- and edge-sharing Dy <sub>3</sub> triangles                                 | 37.9                        | 7   |
| [Dy <sub>6</sub> (μ <sub>3</sub> -CO <sub>3</sub> ) <sub>2</sub> (L <sup>8</sup> ) <sub>5</sub> (HL <sup>8</sup> )(MeOH) <sub>2</sub> ]·4H <sub>2</sub> O·5MeOH·EtOH                                                                              | Trigonal Prism                                                                     | 56                          | 8   |
| [Dy <sub>6</sub> (ovph) <sub>4</sub> (Hpvph) <sub>2</sub> Cl <sub>4</sub> (H <sub>2</sub> O) <sub>2</sub> (CO <sub>3</sub> ) <sub>2</sub> ]·CH <sub>3</sub> OH·H <sub>2</sub> O·CH <sub>3</sub> CN                                                | Trigonal Prism                                                                     | 76                          | 9   |
| [Dy <sub>6</sub> (apovh) <sub>4</sub> (Hapovh) <sub>4</sub> (CO <sub>3</sub> ) <sub>2</sub> (SCN) <sub>2</sub> ]·6CH <sub>3</sub> CN·8CH <sub>3</sub> OH·2H <sub>2</sub> O                                                                        | Dy <sub>3</sub> molecular cluster pair                                             | 29                          | 10  |
| [Dy <sub>6</sub> (L <sup>9</sup> ) <sub>6</sub> (L <sup>11</sup> ) <sub>6</sub> (OCH <sub>3</sub> ) <sub>6</sub> ·2CH <sub>3</sub> OH                                                                                                             | Dy <sub>6</sub> wheels                                                             | 12.2                        | 11  |
| [Dy <sub>6</sub> (L <sup>10</sup> ) <sub>6</sub> (L <sup>11</sup> ) <sub>6</sub> (OCH <sub>3</sub> ) <sub>6</sub> ·2CH <sub>3</sub> OH                                                                                                            |                                                                                    | 11.5                        |     |
| [Dy <sub>7</sub> (OH) <sub>6</sub> (thmeH) <sub>2</sub> (thmeH)(tpa) <sub>6</sub> (MeCN) <sub>2</sub> ](NO <sub>3</sub> ) <sub>2</sub>                                                                                                            | centred-hexagonal Dy <sub>7</sub> core                                             | 140                         | 12  |
| [Dy <sub>8</sub> (μ <sub>3</sub> -CO <sub>3</sub> ) <sub>4</sub> (L <sup>8</sup> ) <sub>8</sub> (H <sub>2</sub> O) <sub>8</sub> ]·10MeOH·2H <sub>2</sub> O                                                                                        | quadruple-CO <sub>3</sub> <sup>2-</sup> bridged Dy <sub>8</sub>                    | 74.2                        | 13  |
| Dy <sub>8</sub> (μ <sub>3</sub> -OH) <sub>4</sub> (L <sup>12</sup> ) <sub>4</sub> (DEA) <sub>4</sub> Cl <sub>4</sub>                                                                                                                              | butterfly-shaped Dy <sub>8</sub>                                                   | 49.3 (5 kOe)                | 14  |
| Dy <sub>8</sub> (μ <sub>3</sub> -OH) <sub>4</sub> (L <sup>13</sup> ) <sub>6</sub> (DMF) <sub>4</sub> (H <sub>2</sub> O) <sub>8</sub>                                                                                                              | Dy <sub>8</sub> core in a staircase-type arrangement                               | 36.5 (5 kOe)                |     |
| [Dy <sub>7</sub> (EDDC)(opch) <sub>4</sub> (O <sub>3</sub> PC <sub>10</sub> H <sub>7</sub> ) <sub>3</sub> (OAc) <sub>5</sub> (MeOH) <sub>2</sub> ]·4MeOH                                                                                          | cyclic Dy <sub>7</sub>                                                             | 74, 177                     | 15  |
| [Dy <sub>14</sub> (EDDC) <sub>4</sub> (opch) <sub>4</sub> (O <sub>3</sub> PC <sub>10</sub> H <sub>7</sub> ) <sub>10</sub> (OAc) <sub>6</sub> (H <sub>2</sub> O) <sub>4</sub> ]·xH <sub>2</sub> O                                                  | dimer of cyclic Dy <sub>7</sub>                                                    | 20.7                        |     |
| [Dy <sub>10</sub> (L <sup>14</sup> H) <sub>10</sub> (K <sup>2</sup> -Piv) <sub>10</sub> ]·9CHCl <sub>3</sub> ·4CH <sub>3</sub> CN                                                                                                                 | Dy <sub>10</sub> wheels                                                            | 16.1                        | 16  |

<sup>a</sup>**Abbreviations:** HL<sup>1</sup>, o-vanillin; H<sub>2</sub>L<sup>2</sup>, 2-hydroxy-ymethyl-6-methoxyphenol; ovnH, o-vanillin; avnH<sub>2</sub>, aldol-vanillin; H<sub>3</sub>L<sup>3</sup>, 2,6-bis((2-hydroxyethylimino)methyl)-4-methylphenol; H<sub>3</sub>L<sup>4</sup>, 1,3-bis(salicylideneamino)-2-propanol; L<sup>5</sup>H<sub>3</sub>, N'-(2-hydroxy-3-methoxybenzylidene)-6-(hydroxymethyl)picolinohydrazide; H<sub>2</sub>L<sup>6</sup>, 6,6'-((1E,1'E)-(2,2'-(pyrimidine-4,6-diyl)bis(hydrazin-2-yl-1-ylidene))bis(methanylylidene))bis(2-methoxyphenol); H<sub>2</sub>L<sup>7</sup>, (E)-N'-(2-hydroxybenzylidene)pyrazine-2-carbohydrazide; H<sub>2</sub>L<sup>8</sup>, (E)-N'-(2-hydroxy-3-methoxybenzylidene) pyrazine-2-carbohydrazide; H<sub>2</sub>ovph, o-vanillin picolinoylhydrazide; H<sub>2</sub>apovh, (N'-(amino(pyridin-2-yl) methylene)-o-vanilloylhydrazide); L<sup>9</sup>H, pivalic acid; L<sup>10</sup>H, 3,5-dinitrobenzoic acid; L<sup>11</sup>H, 2,6-dimethoxyphenol; thmeH<sub>3</sub>, tris(hydroxymethyl)ethane; tpaH, triphenylacetic acid; H<sub>2</sub>EDDC, (N',N'',E,N',N'',E)-N',N''-(ethane-1,2-diylidene)dipyrazine-2-carbohydrazide; H<sub>2</sub>opch (E)-N'-(2-hydroxy-3-methoxybenzylidene) pyrazine-2-carbohydrazide; H<sub>2</sub>L<sup>12</sup>, 3-(pyridin-2-yl)- N'-((pyridin-2-yl)methylene)-1H-pyrazole-5-carbohydrazide; H<sub>3</sub>L<sup>13</sup>, N'-(2-hydroxybenzylidene)-3-(pyridin-2-yl)-1H-pyrazole-5-carbohydrazide; L<sup>14</sup>H<sub>3</sub>, (E)-2-((2-hydroxyethylimino)methyl)-6-(hydroxymethyl)-4-methylphenol.

**Table S2.** Selected bond distances (Å) and angles (deg) in complex 1.

|             |          |            |          |
|-------------|----------|------------|----------|
| Dy(1)-O(1)  | 2.384(5) | Dy(3)-O(1) | 2.378(5) |
| Dy(1)-O(3)  | 2.278(6) | Dy(3)-O(2) | 2.405(5) |
| Dy(1)-O(4)  | 2.342(5) | Dy(3)-O(7) | 2.446(5) |
| Dy(1)-O(10) | 2.326(5) | Dy(3)-O(8) | 2.391(5) |



|                     |             |                   |            |
|---------------------|-------------|-------------------|------------|
| Dy(1)-O(13)         | 2.409(5)    | Dy(3)-O(9)        | 2.327(6)   |
| Dy(1)-N(1)          | 2.420(7)    | Dy(3)-O(10)       | 2.483(5)   |
| Dy(1)-N(2)          | 2.465(6)    | Dy(3)-O(15)       | 2.448(6)   |
| Dy(1)-N(12)         | 2.537(7)    | Dy(3)-N(9)        | 2.511(6)   |
| Dy(2)-O(1)          | 2.383(5)    | Dy(3)-N(10)       | 2.531(6)   |
| Dy(2)-O(2)          | 2.521(5)    | Dy(4)-O(2)        | 2.352(5)   |
| Dy(2)-O(4)          | 2.570(5)    | Dy(4)-O(8)        | 2.341(6)   |
| Dy(2)-O(5)          | 2.285(6)    | Dy(4)-O(12)       | 2.271(5)   |
| Dy(2)-O(6)          | 2.336(5)    | Dy(4)-O(16)       | 2.376(5)   |
| Dy(2)-O(7)          | 2.402(5)    | Dy(4)-O(11)#1     | 2.228(5)   |
| Dy(2)-O(14)         | 2.411(6)    | Dy(4)-O(12)#1     | 2.275(5)   |
| Dy(2)-N(5)          | 2.491(7)    | Dy(4)-N(11)#1     | 2.607(7)   |
| Dy(2)-N(6)          | 2.514(7)    | Dy(4)-Dy(4)#1     | 3.6928(8)  |
| Dy(1)-Dy(2)         | 3.8832(5)   | Dy(2)-Dy(3)       | 3.6379(5)  |
| Dy(1)-Dy(3)         | 3.9632(5)   | Dy(3)-Dy(4)       | 3.7913(5)  |
|                     |             |                   |            |
| O(1)-Dy(1)-O(3)     | 92.5(2)     | O(1)-Dy(3)-O(2)   | 73.29(17)  |
| O(1)-Dy(1)-O(4)     | 74.28(18)   | O(1)-Dy(3)-O(7)   | 72.27(17)  |
| O(1)-Dy(1)-O(10)    | 69.07(17)   | O(1)-Dy(3)-O(8)   | 135.60(18) |
| O(3)-Dy(1)-O(4)     | 164.40(19)  | O(1)-Dy(3)-O(10)  | 66.60(17)  |
| O(3)-Dy(1)-O(10)    | 81.81(19)   | O(2)-Dy(3)-O(7)   | 63.82(18)  |
| O(4)-Dy(1)-O(10)    | 85.68(18)   | O(2)-Dy(3)-O(8)   | 69.29(17)  |
| O(1)-Dy(2)-O(2)     | 71.14(17)   | O(2)-Dy(3)-O(10)  | 68.83(17)  |
| O(1)-Dy(2)-O(4)     | 70.24(18)   | O(7)-Dy(3)-O(8)   | 70.33(17)  |
| O(1)-Dy(2)-O(7)     | 72.96(18)   | O(7)-Dy(3)-O(10)  | 123.86(17) |
| O(2)-Dy(2)-O(4)     | 68.65(16)   | O(8)-Dy(3)-O(10)  | 118.23(18) |
| O(2)-Dy(2)-O(5)     | 75.86(18)   | Dy(1)-O(1)-Dy(2)  | 109.1(2)   |
| O(2)-Dy(2)-O(7)     | 62.72(18)   | Dy(1)-O(4)-Dy(2)  | 104.4(2)   |
| O(4)-Dy(2)-O(7)     | 125.95(17)  | Dy(2)-O(1)-Dy(3)  | 99.64(18)  |
| Dy(2)-Dy(1)-Dy(3)   | 55.233(9)   | Dy(2)-O(2)-Dy(3)  | 95.17(18)  |
| Dy(1)-Dy(2)-Dy(3)   | 63.501(10)  | Dy(2)-O(7)-Dy(3)  | 97.23(18)  |
| Dy(2)-Dy(3)-Dy(4)   | 75.593(11)  | Dy(1)-O(1)-Dy(3)  | 112.7(2)   |
| Dy(1)-Dy(3)-Dy(2)   | 61.267(10)  | Dy(1)-O(10)-Dy(3) | 111.0(2)   |
| Dy(1)-Dy(3)-Dy(4)   | 102.341(12) | Dy(2)-O(2)-Dy(4)  | 138.3(2)   |
| Dy(4)#1-Dy(4)-Dy(3) | 93.435(14)  | Dy(3)-O(2)-Dy(4)  | 105.69(19) |
| Dy(4)-O(12)-Dy(4)#1 | 108.7(2)    | Dy(3)-O(8)-Dy(4)  | 106.5(2)   |

Symmetry codes: #1 -x+2,-y+2,-z

**Table S3.** Results of continuous shape measures analysis for the Dy<sup>III</sup> coordination spheres.

| Dy1                | Dy2             | Dy3             | Dy4                 |
|--------------------|-----------------|-----------------|---------------------|
| TDD-8 ( $D_{2d}$ ) | MFF-9 ( $C_s$ ) | MFF-9 ( $C_s$ ) | CTPR-7 ( $C_{2v}$ ) |
| 2.034              | 1.194           | 1.488           | 1.140               |

TDD-8: Triangular dodecahedron

MFF-9: Muffin

CTPR-7: Capped trigonal prism

## Reference

- 1 I. J. Hewitt, J. Tang, N. T. Madhu, C. E. Anson, Y. Lan, J. Luzon, M. Etienne, R. Sessoli and A. K. Powell, *Angew. Chem. Int. Ed.*, 2010, **49**, 6352-6356.
- 2 B. Hussain, D. Savard, T. J. Burchell, W. Wernsdorfer and M. Murugesu, *Chem. Commun.*, 2009, 1100-1102.
- 3 S.-Y. Lin, W. Wernsdorfer, L. Ungur, A. K. Powell, Y.-N. Guo, J. Tang, L. Zhao, L. F. Chibotaru and H.-J. Zhang, *Angew. Chem. Int. Ed.*, 2012, **51**, 12767-12771.
- 4 H. Ke, L. Zhao, Y. Guo and J. Tang, *Eur. J. Inorg. Chem.*, 2011, 4153-4156.
- 5 S. Das, S. Hossain, A. Dey, S. Biswas, J.-P. Sutter and V. Chandrasekhar, *Inorg. Chem.*, 2014, **53**, 5020-5028.
- 6 X.-L. Li, H. Li, D.-M. Chen, C. Wang, J. Wu, J. Tang, W. Shi and P. Cheng, *Dalton Trans.*, 2015, **44**, 20316-20320.
- 7 H. Tian, Y.-N. Guo, L. Zhao, J. Tang and Z. Liu, *Inorg. Chem.*, 2011, **50**, 8688-8690.
- 8 H. Tian, M. Wang, L. Zhao, Y.-N. Guo, Y. Guo, J. Tang and Z. Liu, *Chem. Eur. J.*, 2012, **18**, 442-445.
- 9 Y.-N. Guo, X.-H. Chen, S. Xue and J. Tang, *Inorg. Chem.*, 2012, **51**, 4035-4042.
- 10 S. Xue, L. Zhao, Y.-N. Guo, P. Zhang and J. Tang, *Chem. Commun.*, 2012, **48**, 8946-8948.
- 11 B. Joarder, S. Mukherjee, S. Xue, J. Tang and S. K. Ghosh, *Inorg. Chem.*, 2014, **53**, 7554-7560.
- 12 J. W. Sharples, Y.-Z. Zheng, F. Tuna, E. J. L. McInnes and D. Collison, *Chem. Commun.*, 2011, **47**, 7650-7652.
- 13 H. Tian, L. Zhao, Y.-N. Guo, Y. Guo, J. Tang and Z. Liu, *Chem. Commun.*, 2012, **48**, 708-710.
- 14 S. Bala, M. S. Bishwas, B. Pramanik, S. Khanra, K. M. Fromm, P. Poddar and R. Mondal, *Inorg. Chem.*, 2015, **54**, 8197-8206.
- 15 H. Tian, S.-S. Bao and L.-M. Zheng, *Chem. Commun.*, 2016, **52**, 2314-2317.
- 16 S. Das, A. Dey, S. Kundu, S. Biswas, R. S. Narayanan, S. Titos-Padilla, G. Lorusso, M. Evangelisti, E. Colacio and V. Chandrasekhar, *Chem. -Eur. J.*, 2015, **21**, 16955-16967.
